# Supplementary material for: Evaluation of anti-stigma social marketing campaigns in Ghana and Kenya: Time to Change Global
Source: Springer Nature journal article supplement (doi:10.1186/s12889-021-10966-8), 2021-05-08
Supplement: MOESM1 [file 19147108]

**PROJECT THINK**

| INTERVIEWER ID NO. |  |  |  |
|--------------------|--|--|--|
|                    |  |  |  |

| SUPERVISOR ID NO |  |  |  |
|------------------|--|--|--|
|                  |  |  |  |

| RESPONDENT ID NO. |  |  |  |  |
|-------------------|--|--|--|--|
|                   |  |  |  |  |

|                                                           |                 |
|-----------------------------------------------------------|-----------------|
| <b>QUESTIONNAIRE CODE</b>                                 |                 |
| <b>NUMBER OF HOUSEHOLD IN DWELLING STRUCTURE</b>          |                 |
| <b>NUMBER OF HOUSEHOLD IN DWELLING STRUCTURE SELECTED</b> |                 |
| <b>IF SUBSTITUTE FOR DWELLING STRUCTURE/HOUSEHOLD</b>     | <b>WRITE IN</b> |

**INTRODUCTION**

Good morning/afternoon/evening. My name is ..... I work for an independent market research company called Consumer Insights Consult Limited. We are currently conducting a study to find out consumer behaviour of people like you. We would be grateful if you assist us in our research. May I assure you that this is a genuine piece of market research. I am not trying to sell you anything and the information that you will provide will be used solely for research purposes.

**INTERVIEWER TO EXPLAIN TO RESPONDENT THAT HIS / HER IDENTITY WILL REMAIN CONFIDENTIAL AND THAT CONSUMER INSIGHTS CONSULT COMPLIES WITH THE MARKETING RESEARCH CODE OF CONDUCT**

Interviewer’s Name.....

Supervisor’s Name.....

Respondent’s Name.....

Back Checked by .....

Address.....

Date of Interview .....

**Sampling Selection Instructions**

**Interviewer:** Recruit Respondent by Kish Grid. Please tell me the names and ages of all males or females (as required) who are **18- 35** years of age starting from the oldest within this age group.

**INTERVIEWER:** RECORD THE NAMES OF ALL ADULTS WITHIN THE TARGET AGE GROUPS. RECORD MALE OR FEMALE MEMBERS (AS REQUIRED) FROM THE OLDEST TO THE YOUNGEST WITHIN THE RELEVANT AGE GROUP AND CHOOSE ONE USING THE KISH-GRID (TABLE) BELOW. REMEMBER TO LIST ONLY ONE GENDER IN EACH HOUSEHOLD.

|   | Name | Age | A | B | C | D | E | F | G | H | J | K |
|---|------|-----|---|---|---|---|---|---|---|---|---|---|
| 1 |      |     | 1 | 1 | 1 | 1 | 1 | 1 | 1 | 1 | 1 | 1 |
| 2 |      |     | 2 | 1 | 2 | 1 | 2 | 1 | 1 | 2 | 2 | 1 |
| 3 |      |     | 3 | 1 | 2 | 3 | 1 | 1 | 3 | 1 | 2 | 1 |
| 4 |      |     | 2 | 2 | 3 | 3 | 1 | 2 | 4 | 3 | 4 | 4 |
| 5 |      |     | 4 | 2 | 4 | 5 | 5 | 3 | 1 | 5 | 3 | 3 |
| 6 |      |     | 5 | 5 | 5 | 2 | 3 | 4 | 1 | 3 | 2 | 6 |

RANDOM SELECTION OF RESPONDENT by Rotating Gender selection

**SCREENING QUESTIONNAIRE**

**S1. GENDER:** Record the gender of the respondent from observation. **DO NOT ASK**

|        |   |
|--------|---|
| Male   | 1 |
| Female | 2 |

**S2.** Have you participated in any market/social research interview in the past 6 months? **READ OUT**

|     |            |                       |
|-----|------------|-----------------------|
|     | <b>(X)</b> |                       |
| Yes | 1          | <b>TERMINATE</b>      |
| No  | 2          | <b>CONTINUE TO S3</b> |

**S3.** Could you please tell me which of the following age groups do you belong?

|                      |   |                       |                         |
|----------------------|---|-----------------------|-------------------------|
| Below 18 below years | 1 | <b>TERMINATE</b>      | <b>RECORD EXACT AGE</b> |
| 18 - 25              | 2 | <b>CONTINUE TO Q1</b> |                         |
| 26 - 30              | 3 |                       |                         |
| 31 - 35              | 4 |                       |                         |
| Above 35 years       | 9 | <b>TERMINATE</b>      |                         |

**MAIN QUESTIONNAIRE**

**Q1.** How many family members currently live in this household?

**Q2.** How many children (less than 16 years old) live in the household? (include all children who stay, eat, and sleep in the household)

**Q3.** How many adults (16 years old or more) live in the household? (include yourself and all adults who stay, eat, and sleep in the household etc.)

**Q4.** Does anyone close to you have or have had some kind of mental health problem? Single response

|                                                      |   |
|------------------------------------------------------|---|
| No-one known                                         | 1 |
| Immediate family (spouse\sister\brother\parent\child | 2 |
| Partner                                              | 3 |
| Other family (uncle\ aunt\cousin\grandparent etc.)   | 4 |
| Friend                                               | 5 |
| Work colleague                                       | 6 |
| Self                                                 | 7 |
| Other (please specify)                               | 8 |

The following questions ask about your views in relation to people who have mental health. For the following questions, please respond by choosing one answer.

**Q5.** Please can you tell me how strongly you agree or disagree with the following statements?

|   |                                                                                                                  | Agree strongly | Agree slightly | Neither agree nor disagree | Disagree slightly | Disagree strongly | DK |
|---|------------------------------------------------------------------------------------------------------------------|----------------|----------------|----------------------------|-------------------|-------------------|----|
| a | In the future, I would be willing to live with someone with a mental health problem                              | 5              | 4              | 3                          | 2                 | 1                 | 99 |
| b | In the future, I would be willing to work with someone with a mental health problem                              | 5              | 4              | 3                          | 2                 | 1                 | 99 |
| c | In the future, I would be willing to live nearby to someone with a mental health problem                         | 5              | 4              | 3                          | 2                 | 1                 | 99 |
| d | In the future, I would be willing to continue a relationship with a friend who developed a mental health problem | 5              | 4              | 3                          | 2                 | 1                 | 99 |

**Q6.** And to what extent do you agree or disagree with the following statements?

|   |                                                                                                        | Agree strongly | Agree slightly | Neither agree nor disagree | Disagree slightly | Disagree strongly | DK |
|---|--------------------------------------------------------------------------------------------------------|----------------|----------------|----------------------------|-------------------|-------------------|----|
| a | One of the main causes of mental illness is a lack of self-discipline and will-power                   | 5              | 4              | 3                          | 2                 | 1                 | 99 |
| b | There is something about people with mental illness that makes it easy to tell them from normal people | 5              | 4              | 3                          | 2                 | 1                 | 99 |
| c | We need to adopt a far more tolerant attitude toward people with mental illness in our society         | 5              | 4              | 3                          | 2                 | 1                 | 99 |
| d | People with mental illness don't deserve our sympathy                                                  | 5              | 4              | 3                          | 2                 | 1                 | 99 |
| e | I would not want to live next door to someone who has been mentally ill                                | 5              | 4              | 3                          | 2                 | 1                 | 99 |
| f | It is frightening to think of people with mental problems living in residential neighbourhoods         | 5              | 4              | 3                          | 2                 | 1                 | 99 |

**Q7.** And to what extent do you agree or disagree with the following statements?

|   |                                                                                          | Agree strongly | Agree slightly | Neither agree nor disagree | Disagree slightly | Disagree strongly | DK |
|---|------------------------------------------------------------------------------------------|----------------|----------------|----------------------------|-------------------|-------------------|----|
| g | Mental illness is an illness like any other                                              | 5              | 4              | 3                          | 2                 | 1                 | 99 |
| h | Virtually anyone can become mentally ill                                                 | 5              | 4              | 3                          | 2                 | 1                 | 99 |
| i | The best therapy for many people with mental illness is to be part of a normal community | 5              | 4              | 3                          | 2                 | 1                 | 99 |
| j | People with mental health problems are far less of a danger than most people suppose     | 5              | 4              | 3                          | 2                 | 1                 | 99 |
| k | People with mental health problems should not be given any responsibility                | 5              | 4              | 3                          | 2                 | 1                 | 99 |
| l | I have very little knowledge about mental illness                                        | 5              | 4              | 3                          | 2                 | 1                 | 99 |
| m | Most women who were once patients in a mental hospital can be trusted as babysitters     | 5              | 4              | 3                          | 2                 | 1                 | 99 |

**Q8.** Can you tell me how strongly you agree or disagree with the following statements? Mental health problems here refer, for example, to conditions for which an individual would be seen by healthcare staff?

|   |                                                                                                                         | Agree strongly | Agree slightly | Neither agree nor disagree | Disagree slightly | Disagree strongly | DK |
|---|-------------------------------------------------------------------------------------------------------------------------|----------------|----------------|----------------------------|-------------------|-------------------|----|
| a | Most people with mental health problems want to have paid employment                                                    | 5              | 4              | 3                          | 2                 | 1                 | 99 |
| b | If a friend had a mental health problem, I know what advice to give them to get professional help                       | 5              | 4              | 3                          | 2                 | 1                 | 99 |
| c | Medication can be an effective treatment for people with mental health problems                                         | 5              | 4              | 3                          | 2                 | 1                 | 99 |
| d | Psychotherapy (eg. talking therapy or counselling) can be an effective treatment for people with mental health problems | 5              | 4              | 3                          | 2                 | 1                 | 99 |
| e | People with severe mental health problems can fully recover                                                             | 5              | 4              | 3                          | 2                 | 1                 | 99 |
| f | Most people with mental health problems go to a healthcare professional to get help                                     | 5              | 4              | 3                          | 2                 | 1                 | 99 |
| g | Mental health problems are genetic – they are passed on through generations                                             | 5              | 4              | 3                          | 2                 | 1                 | 99 |
| h | Mental health problems can be caused by a curse                                                                         | 5              | 4              | 3                          | 2                 | 1                 | 99 |

**Q9.** Can you tell me to what extent you agree or disagree that each of the following is a type of mental health problem?

|   |                                     | Agree strongly | Agree slightly | Neither agree nor disagree | Disagree slightly | Disagree strongly | DK |
|---|-------------------------------------|----------------|----------------|----------------------------|-------------------|-------------------|----|
| a | Depression                          | 5              | 4              | 3                          | 2                 | 1                 | 99 |
| b | Stress                              | 5              | 4              | 3                          | 2                 | 1                 | 99 |
| c | Schizophrenia                       | 5              | 4              | 3                          | 2                 | 1                 | 99 |
| d | Bipolar disorder (manic-depression) | 5              | 4              | 3                          | 2                 | 1                 | 99 |
| e | Drug addiction                      | 5              | 4              | 3                          | 2                 | 1                 | 99 |
| f | Grief                               | 5              | 4              | 3                          | 2                 | 1                 | 99 |

**Have you .....**

|     |                                                                                                                | Yes | No | Don't know |
|-----|----------------------------------------------------------------------------------------------------------------|-----|----|------------|
| Q10 | Met anyone that has talked about their own experience of mental health problems recently?                      | 1   | 2  | 3          |
| Q11 | Seen any activity or publicity for a mental health campaign in the local community at all recently?            | 1   | 2  | 3          |
| Q12 | Read, any news stories or articles about a mental health campaign in newspapers, magazines or online recently? | 1   | 2  | 3          |
| Q13 | Heard any advertising or features on the radio recently for a mental health campaign?                          | 1   | 2  | 3          |
| Q14 | Seen any advertising for a mental health campaign in any newspapers or magazines press recently?               | 1   | 2  | 3          |
| Q15 | Seen any activity or advertising online for a mental health campaign?                                          | 1   | 2  | 3          |
| Q16 | Seen any advertising on TV recently for a mental health campaign?                                              | 1   | 2  | 3          |
| Q17 | Seen any advertising on social media for a mental health campaign?                                             | 1   | 2  | 3          |

Interviewer: Please show relevant advert to respondent and ask the following questions;

|     |                                                                                                                                    | Yes | No | Don't know |
|-----|------------------------------------------------------------------------------------------------------------------------------------|-----|----|------------|
| Q18 | This is a clip of some advertising that may have been played on the radio recently. Do you remember hearing it before?             | 1   | 2  | 3          |
| Q19 | This is a picture of some advertising that may have been posted in the local community recently. Do you remember seeing it before? | 1   | 2  | 3          |
| Q20 | This is a picture of some advertising that may have been appeared in the newspapers recently. Do you remember seeing it before?    | 1   | 2  | 3          |
| Q21 | This is an advert that may have been appeared online recently. Do you remember seeing it before?                                   | 1   | 2  | 3          |

## DEMOGRAPHICS

F1. What is your occupation?

|                                    |    |
|------------------------------------|----|
| Farmer                             | 1  |
| Trader                             | 2  |
| Mason                              | 3  |
| Carpenter                          | 4  |
| Tailor/Seamstress/Fashion designer | 5  |
| Hairdresser                        | 6  |
| Teacher                            | 7  |
| Government Employee                | 8  |
| Worker at a private firm           | 9  |
| Security                           | 10 |
| Housewife                          | 11 |
| Self-employed/own business         | 12 |
| Apprentice                         | 13 |
| Student                            | 14 |
| Retired                            | 15 |
| Not working                        | 16 |
| Other, please specify              | 17 |

F2. Please, may I know your level of education?

|              |   |
|--------------|---|
| None         | 1 |
| Kindergarten | 2 |
| Primary      | 3 |
| JSS/JHS      | 4 |
| Middle       | 5 |
| SSS/SHS      | 6 |
| Secondary    | 7 |

|                                                                             |    |
|-----------------------------------------------------------------------------|----|
| Vocational/Technical/Comm. Teacher Training/Agricultural                    | 8  |
| Nursing Certificate                                                         | 9  |
| Post-Secondary Diploma (HND, Teacher training, Nursing, University Diploma) | 10 |
| Bachelor degree                                                             | 12 |
| Post graduate                                                               | 13 |
| Don't know                                                                  | 14 |

F3. What is your religious denomination?

|                                  |   |
|----------------------------------|---|
| Catholic / Anglican              | 1 |
| Presbyterian, Baptist, Methodist | 2 |
| Seventh-Day Adventist (SDA)      | 3 |
| Pentecostal/ Charismatic         | 4 |
| Other Christians                 | 5 |
| Islam                            | 6 |
| Traditional                      | 7 |
| No religion                      | 8 |
| Other religion                   | 9 |

F4. Which of this best describes your marital status?

|                                              |   |
|----------------------------------------------|---|
| Married                                      | 1 |
| Living with someone in a stable relationship | 2 |
| Single/never married                         | 3 |
| Divorced/separated                           | 4 |
| Widowed                                      | 5 |

F5. Ethnicity?

|                       |    |
|-----------------------|----|
| Akan                  | 1  |
| Ashanti               | 2  |
| Ewe                   | 3  |
| Fanti                 | 4  |
| Ga                    | 5  |
| Ga Adangbe            | 6  |
| Nzema                 | 7  |
| Kusasi                | 8  |
| Nanumba               | 9  |
| Krobo                 | 10 |
| Frafra                | 11 |
| Akuapem               | 12 |
| Dagomba               | 13 |
| Gonja                 | 14 |
| Mamprusi              | 15 |
| Kasena                | 16 |
| Efutu                 | 17 |
| Konkomba              | 18 |
| Other, please specify | 19 |

**SOCIAL CLASS MEASUREMENT**

**INTERVIEWER READ: NOW I WOULD LIKE TO ASK YOU ABOUT YOUR LIVING STANDARD IN THIS HOUSEHOLD. THERE ARE SOME ITEMS WHICH I WOULD MENTION AND YOU EITHER TELL ME "YES" - IF YOU POSSESS THEM OR "NO" - IF YOU DON'T POSSESS THEM.**

**Living Standard Measurement Table**

Socio-economic grading via income of household or income of the respondent is not practicable in this part of the world hence the use of various relevant household durables with appropriate weight to each variable in terms of scores as demonstrated below:

| Type              | Description                   | Score | Instruction                     |
|-------------------|-------------------------------|-------|---------------------------------|
| Ownership         | Household help                | 2     | <b>Multiple Answer possible</b> |
|                   | Fridge/deep freezer           | 3     |                                 |
|                   | Video                         | 1     |                                 |
|                   | Car                           | 2     |                                 |
|                   | Colour TV                     | 1     |                                 |
|                   | Music system                  | 1     |                                 |
|                   | Air conditioning unit (split) | 4     |                                 |
|                   | Air conditioning              | 3     |                                 |
|                   | Satellite dish                | 3     |                                 |
|                   | Washing machine               | 4     |                                 |
|                   | Black & White TV              | 1     |                                 |
|                   | DVD (Digital video disk)      | 4     |                                 |
|                   | Cable satellite               | 2     |                                 |
|                   | Telephone (land)              | 3     |                                 |
|                   | Telephone (mobile)            | 1     |                                 |
|                   | Personal driver               | 2     |                                 |
|                   | Multiple cars                 | 3     |                                 |
|                   | Computer                      | 3     |                                 |
| Computer Laptop   | 4                             |       |                                 |
| Generator         | 4                             |       |                                 |
| Cooking           | Gas/Electric Cooker           | 2     | <b>Multiple Answer possible</b> |
|                   | Kerosene stove                | 1     |                                 |
|                   | Charcoal/wood                 | 0     |                                 |
| Toilet Type       | Inside/Outside WC             | 2     | <b>Single Answer</b>            |
|                   | Pit latrine                   | 1     |                                 |
|                   | None                          | 0     |                                 |
| Main Water Source | Inside                        | 3     | <b>Single Answer</b>            |
|                   | Outside pipe borne tap        | 3     |                                 |
|                   | Borehole                      | 2     |                                 |
|                   | Well                          | 1     |                                 |
|                   | Stream                        | 0     |                                 |

|                             | Description                 | Score | Instruction          |
|-----------------------------|-----------------------------|-------|----------------------|
| Education of household head | Primary Incomplete          | 1     | <b>Single Answer</b> |
|                             | Primary complete            | 1     |                      |
|                             | Secondary Incomplete        | 1     |                      |
|                             | Secondary complete          | 2     |                      |
|                             | University/Polytechnic: OND | 3     |                      |
|                             | University/Polytechnic: HND | 3     |                      |
|                             | Post-University Incomplete  | 4     |                      |
|                             | Post University Complete    | 5     |                      |
|                             | Illiterate/None             | 0     |                      |
| Residential Area            | Low density                 | 3     | <b>Single Answer</b> |
|                             | Medium density              | 2     |                      |
|                             | High density                | 1     |                      |
| Type Of House               | Self-occupied bungalow      | 2     |                      |
|                             | Villa                       | 5     |                      |



|                    |                                                                 |   |                                 |
|--------------------|-----------------------------------------------------------------|---|---------------------------------|
|                    | Flat                                                            | 3 | <b>Single Answer</b>            |
|                    | Duplex                                                          | 4 |                                 |
|                    | Mini flat                                                       | 2 |                                 |
|                    | Room and parlour                                                | 1 |                                 |
|                    | Room                                                            | 1 |                                 |
| Occupation         | Senior Management/Admin.                                        | 5 | <b>Single Answer</b>            |
|                    | Managing Director                                               | 5 |                                 |
|                    | Head of department/Senior Manager                               | 4 |                                 |
|                    | Manager                                                         | 3 |                                 |
|                    | Professional e.g. Doctor, Lawyer, Engineers, Surveyors etc.     | 4 |                                 |
|                    | Skilled workers (mechanics, tailoring, carpenters, bricklayers) | 2 |                                 |
|                    | Unskilled workers                                               | 1 |                                 |
|                    | Clerical workers                                                | 2 |                                 |
| Lifestyle          | Unemployed                                                      | 0 | <b>Multiple Answer possible</b> |
|                    | Membership of social/recreational club                          | 3 |                                 |
|                    | Travel abroad for holidays                                      | 4 |                                 |
|                    | Read regularly as a habit                                       | 2 |                                 |
|                    | Spend leisure time with friends                                 | 1 |                                 |
|                    | Attend social occasions                                         | 1 |                                 |
| <b>TOTAL SCORE</b> | Like modern fashion                                             | 1 |                                 |
|                    |                                                                 |   |                                 |

**USE THIS TABLE TO INDICATE THE SOCIO-ECONOMIC CLASS OF THE RESPONDENT**

|                      |              |   |
|----------------------|--------------|---|
| AB                   | 70 and above | 1 |
| <b>C<sub>1</sub></b> | 56 – 69      | 2 |
| <b>C<sub>2</sub></b> | 35 – 55      | 3 |
| DE                   | Under 35     | 4 |

CLOSE INTERVIEW AND THANK THE RESPONDENT
