# Supplementary material for: Evaluation of anti-stigma social marketing campaigns in Ghana and Kenya: Time to Change Global
Source: Springer Nature journal article supplement (doi:10.1186/s12889-021-10966-8), 2021-05-08
Supplement: MOESM2 [file 19147108]

**Table S2: Percentage (%) of participants who strongly or slightly agree to the MAKS Items and additional knowledge items by Site and Pre vs. Post**

| <b>MAKS- Part A (Knowledge)</b>                                                                                                     | <b>Ghana Pre<br/>(n=408)</b> | <b>Ghana Post<br/>(n=402)</b> | <b>Kenya Pre<br/>(n=419)</b> | <b>Kenya Post<br/>(n=411)</b> |
|-------------------------------------------------------------------------------------------------------------------------------------|------------------------------|-------------------------------|------------------------------|-------------------------------|
| 1. Most people with mental health problems want to have paid employment (True)                                                      | 44.4                         | 44.8                          | 43.2                         | 52.1                          |
| 2. If a friend had a mental health problem, I know what advice to give them to get professional help (True)                         | 85.3                         | 85.3                          | 66.1                         | 74.9                          |
| 3. Medication can be an effective treatment for people with mental health problems (True)                                           | 81.4                         | 88.6                          | 80.2                         | 81.8                          |
| 4. Psychotherapy (e.g., talking therapy or counselling) can be an effective treatment for people with mental health problems (True) | 89.0                         | 88.1                          | 79.5                         | 86.4                          |
| 5. People with severe mental health problems can fully recover (True)                                                               | 68.1                         | 72.1                          | 57.8                         | 62.8                          |
| 6. Most people with mental health problems go to a healthcare professional to get help (False)                                      | 65.4                         | 76.1                          | 52.0                         | 49.6                          |
| Mental health problems are genetic – they are passed on through generations (False)                                                 | 61.8                         | 54.2                          | 38.2                         | 39.7                          |
| Mental health problems can be caused by a curse (False)                                                                             | 84.1                         | 74.1                          | 39.4                         | 31.6                          |
| <b>MAKS- Part B (Agreement as to whether each condition is a type of mental illness)</b>                                            |                              |                               |                              |                               |
| Depression (True)                                                                                                                   | 91.2                         | 89.1                          | 89.5                         | 93.7                          |
| Stress (False)                                                                                                                      | 73.5                         | 68.7                          | 86.4                         | 86.6                          |
| Schizophrenia (True)                                                                                                                | 89.5                         | 78.1                          | 85.2                         | 86.6                          |
| Bipolar disorder (manic depression) (True)                                                                                          | 88.7                         | 87.3                          | 86.4                         | 85.6                          |
| Drug Addiction (True)                                                                                                               | 94.4                         | 93.5                          | 82.6                         | 82.2                          |
| Grief (False)                                                                                                                       | 80.6                         | 78.4                          | 59.9                         | 69.1                          |

**Table S3: Percentage (%) of participants who strongly or slightly agree to the CAMI Items by Site and Pre vs. Post**

| <b>CAMI (Attitude)</b>                                                                                    | <b>Ghana Pre<br/>(n=408)</b> | <b>Ghana Post<br/>(n=402)</b> | <b>Kenya Pre<br/>(n=419)</b> | <b>Kenya Post<br/>(n=411)</b> |
|-----------------------------------------------------------------------------------------------------------|------------------------------|-------------------------------|------------------------------|-------------------------------|
| 1. One of the main causes of mental illness is a lack of self-discipline and willpower                    | 63.0                         | 58.2                          | 35.6                         | 36.7                          |
| 2. There is something about people with mental illness that makes it easy to tell them from normal people | 77.5                         | 82.1                          | 73.8                         | 67.6                          |
| 3. We need to adopt a far more tolerant attitude toward people with mental illness in our society         | 86.5                         | 90.6                          | 76.9                         | 76.9                          |
| 4. People with mental illness don't deserve our sympathy                                                  | 36.3                         | 20.7                          | 6.9                          | 11.2                          |
| 5. I would not want to live next door to someone who has been mentally ill                                | 44.1                         | 48.0                          | 24.8                         | 24.3                          |
| 6. It is frightening to think of people with mental problems living in residential neighbourhoods         | 47.8                         | 55.2                          | 26.0                         | 29.7                          |
| 7. Mental illness is an illness like any other                                                            | 39.2                         | 39.6                          | 83.1                         | 74.5                          |
| 8. Virtually anyone can become mentally ill                                                               | 80.4                         | 88.3                          | 87.4                         | 86.6                          |
| 9. The best therapy for many people with mental illness is to be part of a normal community               | 71.3                         | 72.6                          | 73.3                         | 70.6                          |
| 10. People with mental illness are far less of a danger than most people suppose                          | 58.1                         | 57.5                          | 45.6                         | 46.0                          |
| 11. People with mental illness should not be given any responsibility                                     | 46.1                         | 49.0                          | 42.2                         | 32.9                          |
| 12. Most women who were once patients in a mental hospital can be trusted as babysitters                  | 22.1                         | 33.1                          | 21.2                         | 24.3                          |

**Table S4: Percentage (%) of participants who strongly or slightly agree to the RIBS IB Items by Site and Pre vs. Post**

| <b>Intended Behaviour (strongly or slightly agree)</b> | <b>Ghana Pre<br/>(n=408)</b> | <b>Ghana Post<br/>(n=402)</b> | <b>Kenya Pre<br/>(n=419)</b> | <b>Kenya Post<br/>(n=411)</b> |
|--------------------------------------------------------|------------------------------|-------------------------------|------------------------------|-------------------------------|
| Live with                                              | 33.6                         | 35.6                          | 51.8                         | 50.6                          |
| Work with                                              | 29.4                         | 39.3                          | 52.7                         | 53.0                          |
| Live nearby                                            | 47.6                         | 51.5                          | 55.6                         | 53.5                          |
| Continue a relationship with a friend                  | 64.2                         | 76.6                          | 47.7                         | 52.1                          |
